# Supplementary material
Source: publisher figshare collection journal article supplement (https://sage.figshare.com/ndownloader/files/18109841)
Supplement: Supplementary file 1 [file 18109841]

# SAGE AUTHORSHIP CHANGE REQUEST

## INSTRUCTIONS:

Please print and complete all sections of this form. We require that all authors (including current co-authors, those to be added and those to be removed) sign the relevant sections below. Once complete, please scan the form and return to [jpoweng@sagepub.co.uk](mailto:jpoweng@sagepub.co.uk)

## SECTION ONE: PAPER INFORMATION

|              |                                                                                                     |                      |
|--------------|-----------------------------------------------------------------------------------------------------|----------------------|
| JOURNAL NAME | Proceedings of the Institution of Mechanical Engineers, Part A: Journal of Power and Energy         |                      |
| PAPER TITLE  | Tip leakage flow analysis of an axial-turbine under the effect of separation at low Reynolds number | MANUSCRIPT ID NUMBER |
|              |                                                                                                     | JPE-19-0190.R1       |

## SECTION TWO: ESSENTIAL CONDITIONS FOR CHANGE

The new author list should contain only those who can legitimately claim authorship. This is all those who:

- 1) Have made a substantial contribution to the concept and design, acquisition of data or analysis and interpretation of data; AND
- 2) Drafted the article or revised it critically for important intellectual content; AND
- 3) Approved the version to be published.

NB: Registered authors should meet the conditions of all of the points above. All contributors who do not meet the criteria for authorship should instead be listed in an 'Acknowledgements' section.

## SECTION THREE: REASON FOR AUTHORSHIP CHANGE

Please provide a detailed explanation for the change in authors in the box below.

Dear Akhil Ahluwalia,

Thank you very much for your notification. I am very sorry for the trouble caused by the co-author's change. As the corresponding author, I thought carefully and eventually make this decision through the discussion with other authors. The reason why we added "Wei Qin" in the author list of the revised manuscript is that Dr. Qin has made some contribution during the revision process of our manuscript such as the correction of description of the article, text layout and proofing. We have informed the other authors about the situation and they have agreed to add the author.

The specific work done by Wei Qin is as follows:

- (1) The correction for generality form of the Eq. (12);
- (2) The improvement for the description of the modified scraping ratio;
- (3) The layout and correction of the parts of the article.

At last, I would like to reiterate the following:

- (1) The article and the research content are real, there is no improper behaviour;
- (2) I have consulted other authors and obtained the agreement of the first author's and co-authors;

(3) No conflict of interest exists in the submission of this manuscript, and the manuscript is approved by all authors for publication.

If you have any queries, please don't hesitate to contact me at the address below.  
Thank you and best regards.

Sincerely,

Corresponding author:

Name: Haisheng Chen

E-mail: chen\_hs@mail.etp.ac.cn



#### SECTION FOUR: AUTHOR DECLARATIONS

We agree to the proposed change of authorship to the above paper. NB: all authors (added and removed) must sign below

**DECLARATION:** All the below listed authors agree that they can claim authorship to the submitted paper as they meet the criteria of the points listed in SECTION TWO.

| List of existing and proposed new authors to sign. Please sign, indicating your agreement to the proposed change. The individuals listed below will each be credited as authors in the published paper. (Please add additional rows if required.) |                  |      |
|---------------------------------------------------------------------------------------------------------------------------------------------------------------------------------------------------------------------------------------------------|------------------|------|
| Author name                                                                                                                                                                                                                                       | Author signature | Date |
| Ziyi Shao                                                                                                                                                                                                                                         | Ziyi Shao        |      |
| Wen Li                                                                                                                                                                                                                                            | Wen Li           |      |
| Yangli Zhu                                                                                                                                                                                                                                        | Yangli Zhu       |      |
| Xing Wang                                                                                                                                                                                                                                         | Xing Wang        |      |
| Xuehui Zhang                                                                                                                                                                                                                                      | Xuehui Zhang     |      |
| Haisheng Chen                                                                                                                                                                                                                                     | Haisheng Chen    |      |
| Wei Qin                                                                                                                                                                                                                                           | Wei Qin          |      |

**DECLARATION:** All the below listed authors agree that they cannot claim authorship to the submitted paper as they do not (or no longer) meet the criteria of the points listed in SECTION TWO.

| List of removed authors. Please sign, indicating your agreement to be removed from the list of registered authors. The individuals listed below will not be credited as authors in the published paper. (Please add additional rows if required.) |                  |      |
|---------------------------------------------------------------------------------------------------------------------------------------------------------------------------------------------------------------------------------------------------|------------------|------|
| Author name                                                                                                                                                                                                                                       | Author signature | Date |
|                                                                                                                                                                                                                                                   |                  |      |
